# Supplementary material
Source: publisher figshare collection journal article supplement (https://plos.figshare.com/articles/dataset/_/1309284)

**A**

ovulation rate

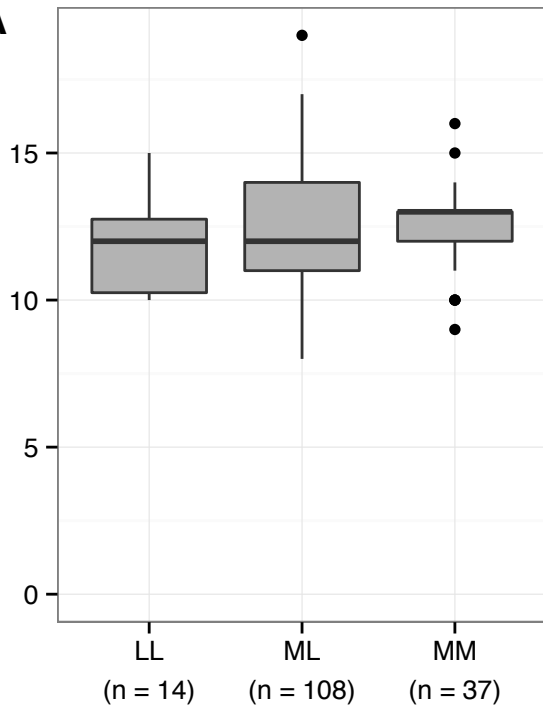**B**

live embryos

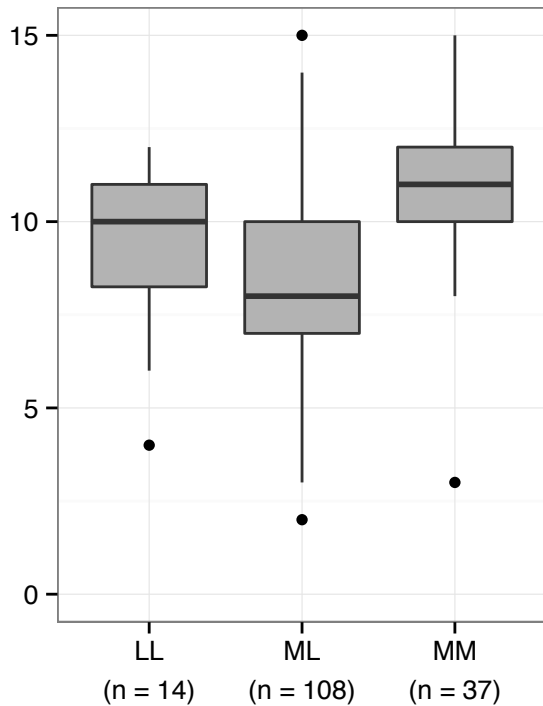

Supplement: Supplementary file [file 1]
