# Supplementary material
Source: publisher figshare collection journal article supplement (https://plos.figshare.com/articles/dataset/_/1309284)

**A**recombinant  
chromosomeother  
chromosomeMDA  
sum-intensity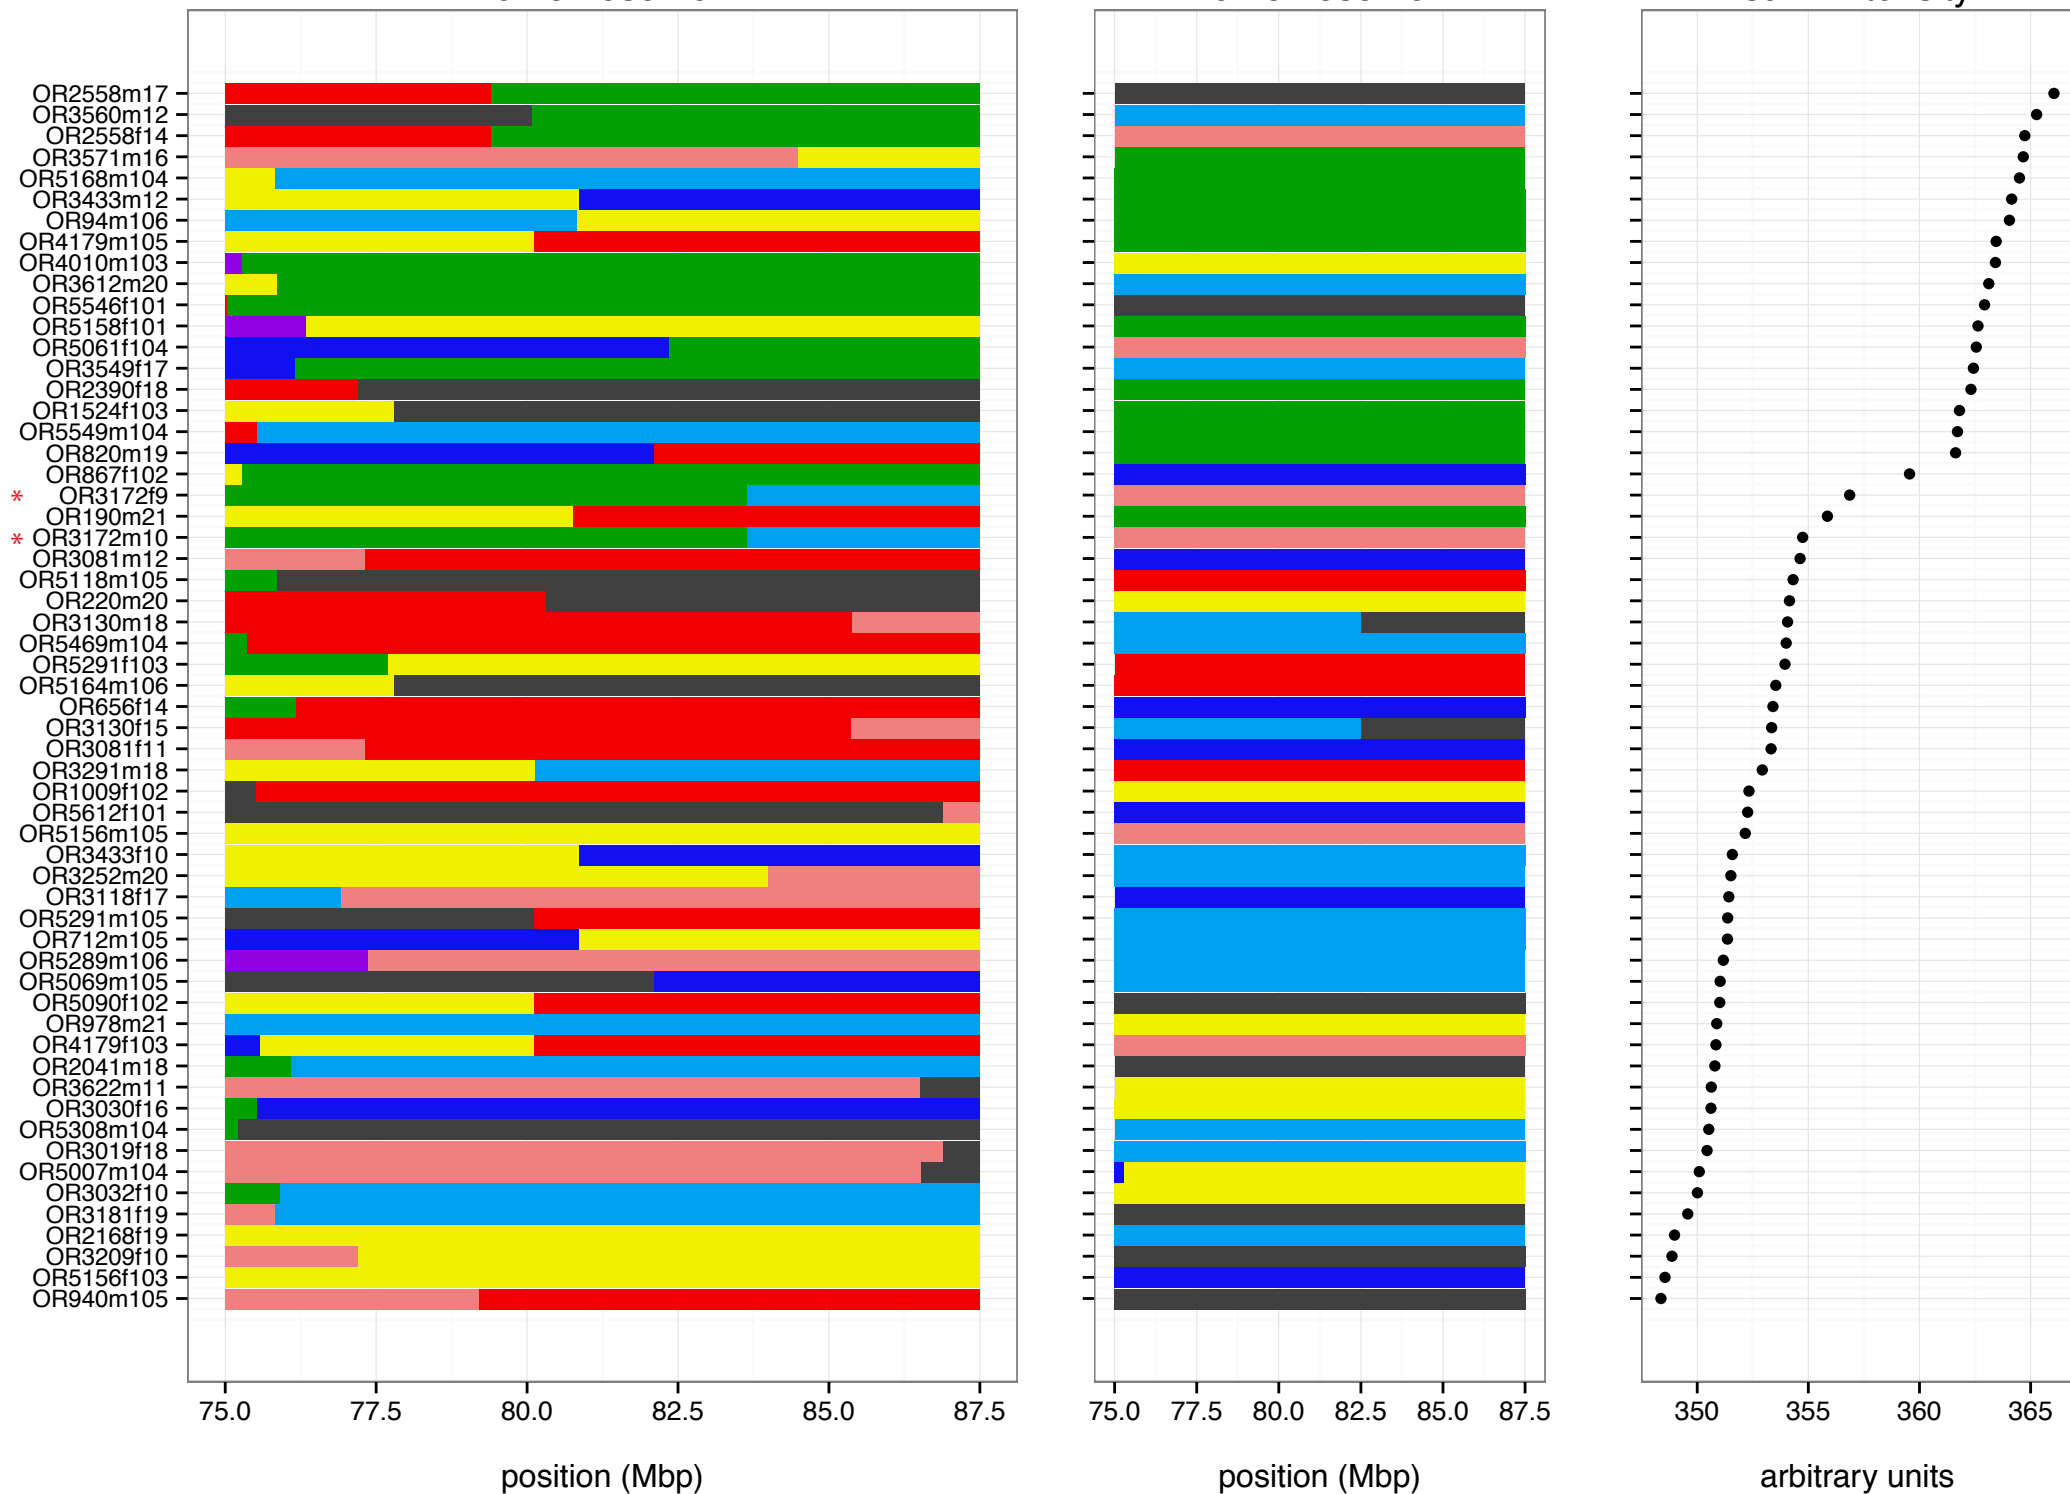

**B**first  
chromosome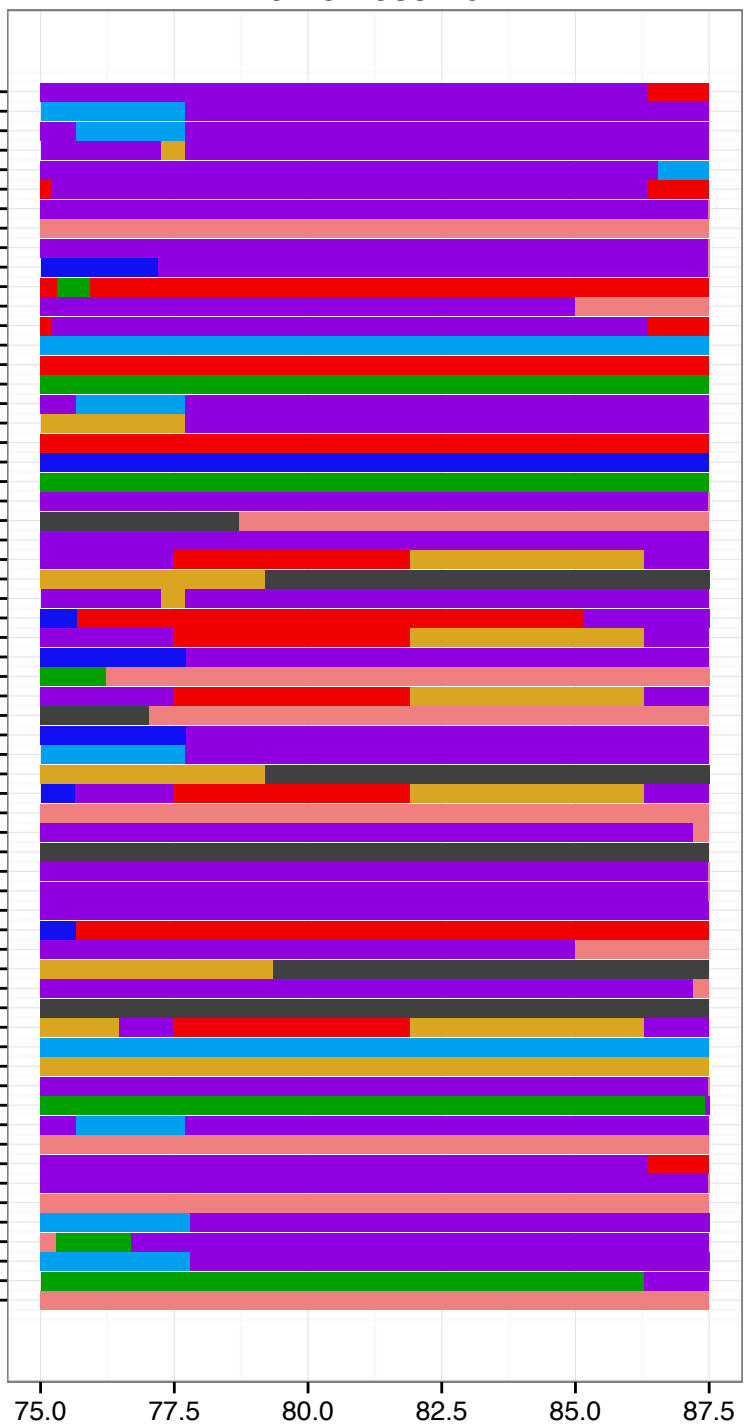

position (Mbp)

second  
chromosome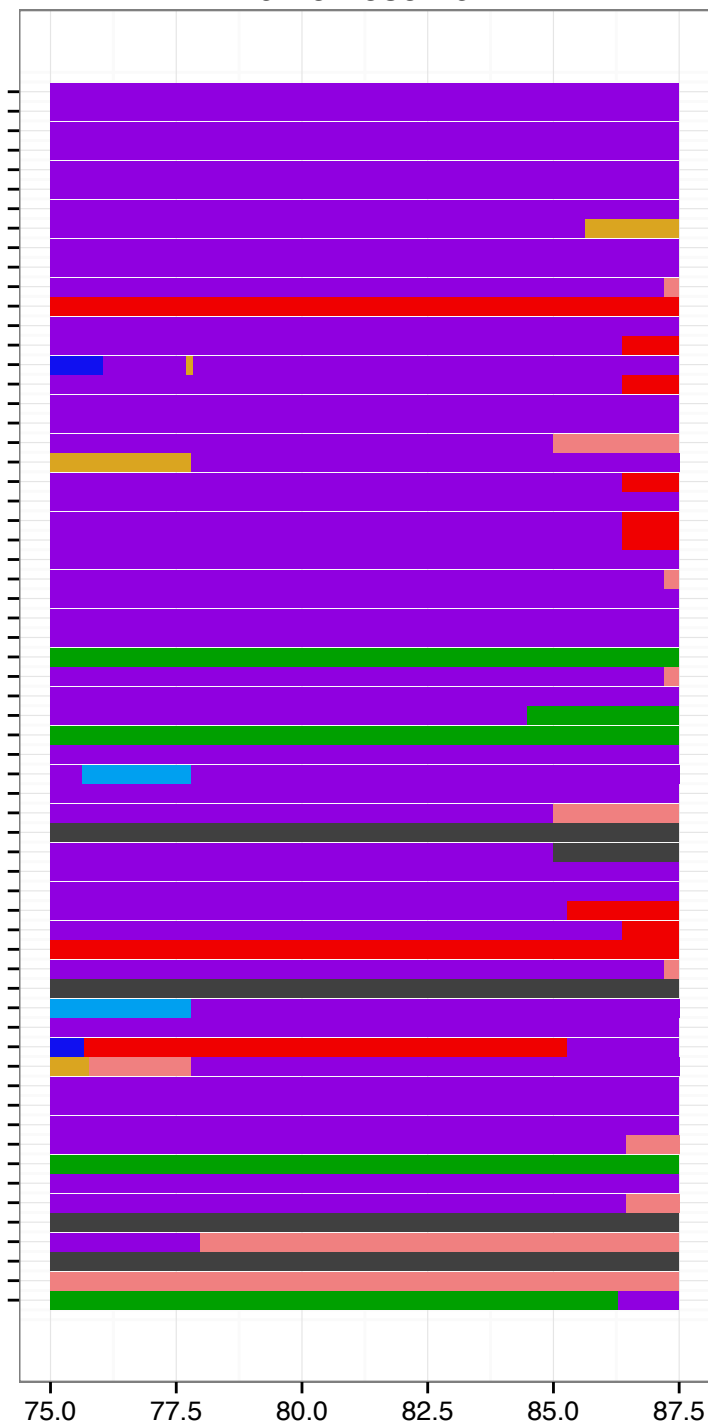

position (Mbp)

MegaMUGA  
sum-intensity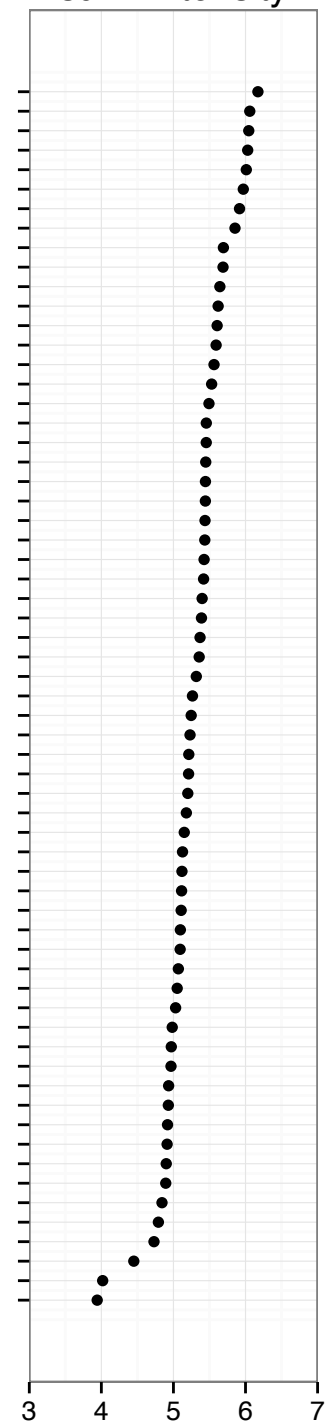

arbitrary units

\*

\*

**C**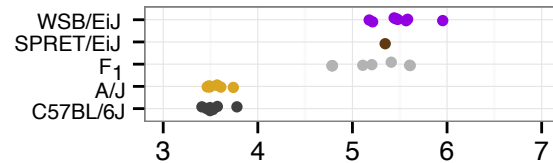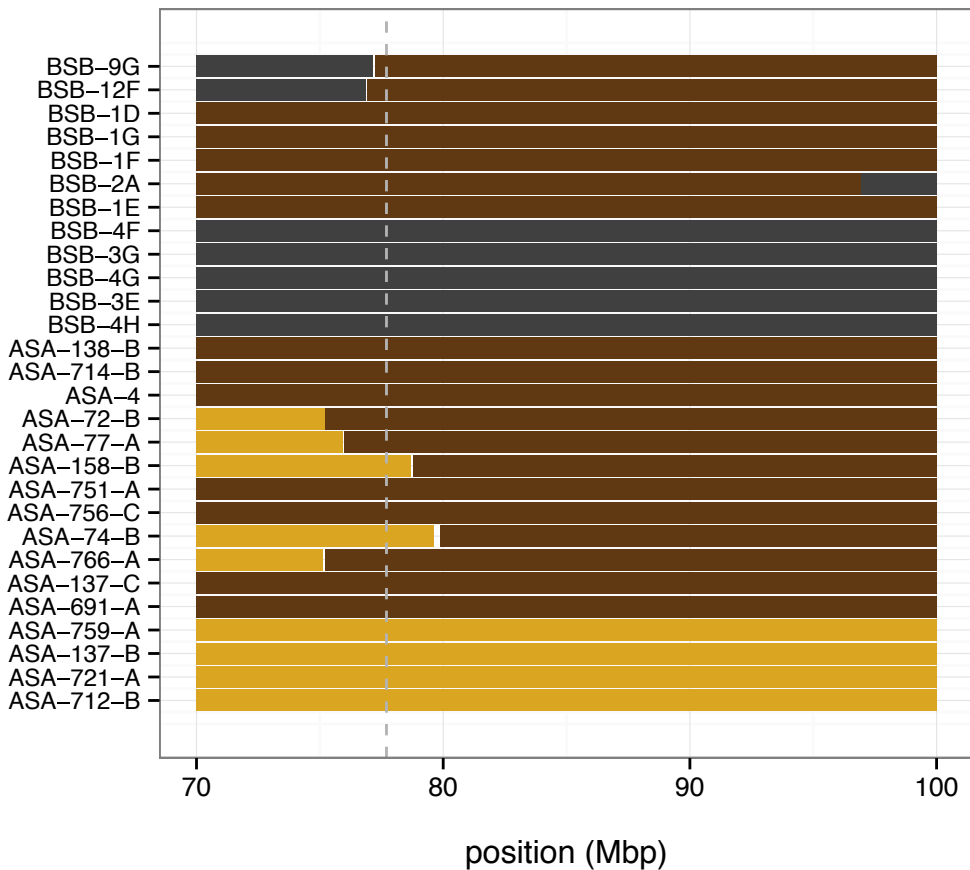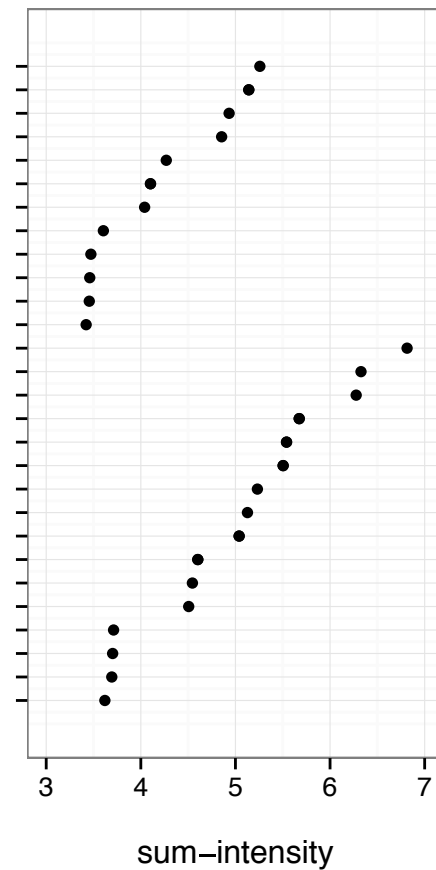

Supplement: Supplementary file [file 1]
