# Supplementary material
Source: publisher figshare collection journal article supplement (https://plos.figshare.com/articles/dataset/_/1309284)

DO-G13-049

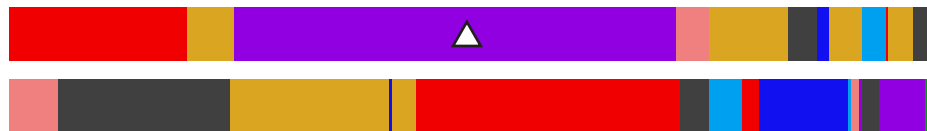

**5**  
( $4.6 \pm 0.1$ )

DO-G16-107

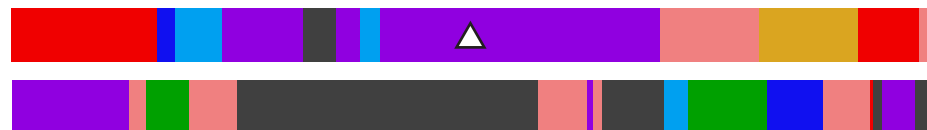

**9**  
( $9.1 \pm 2.0$ )

DO-G13-044

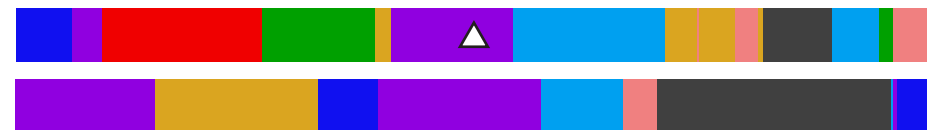

**11**  
( $11.1 \pm 6.8$ )

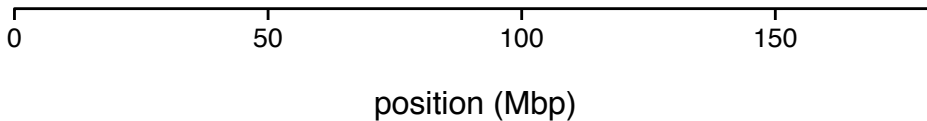

Supplement: Supplementary file [file 1]
