# Supplementary material
Source: publisher figshare collection journal article supplement (https://plos.figshare.com/articles/dataset/_/1309284)

Cross

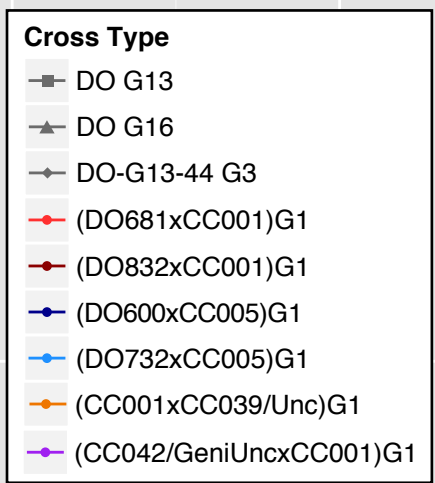

0.00 0.25 0.50 0.75 1.00

Transmission Ratio

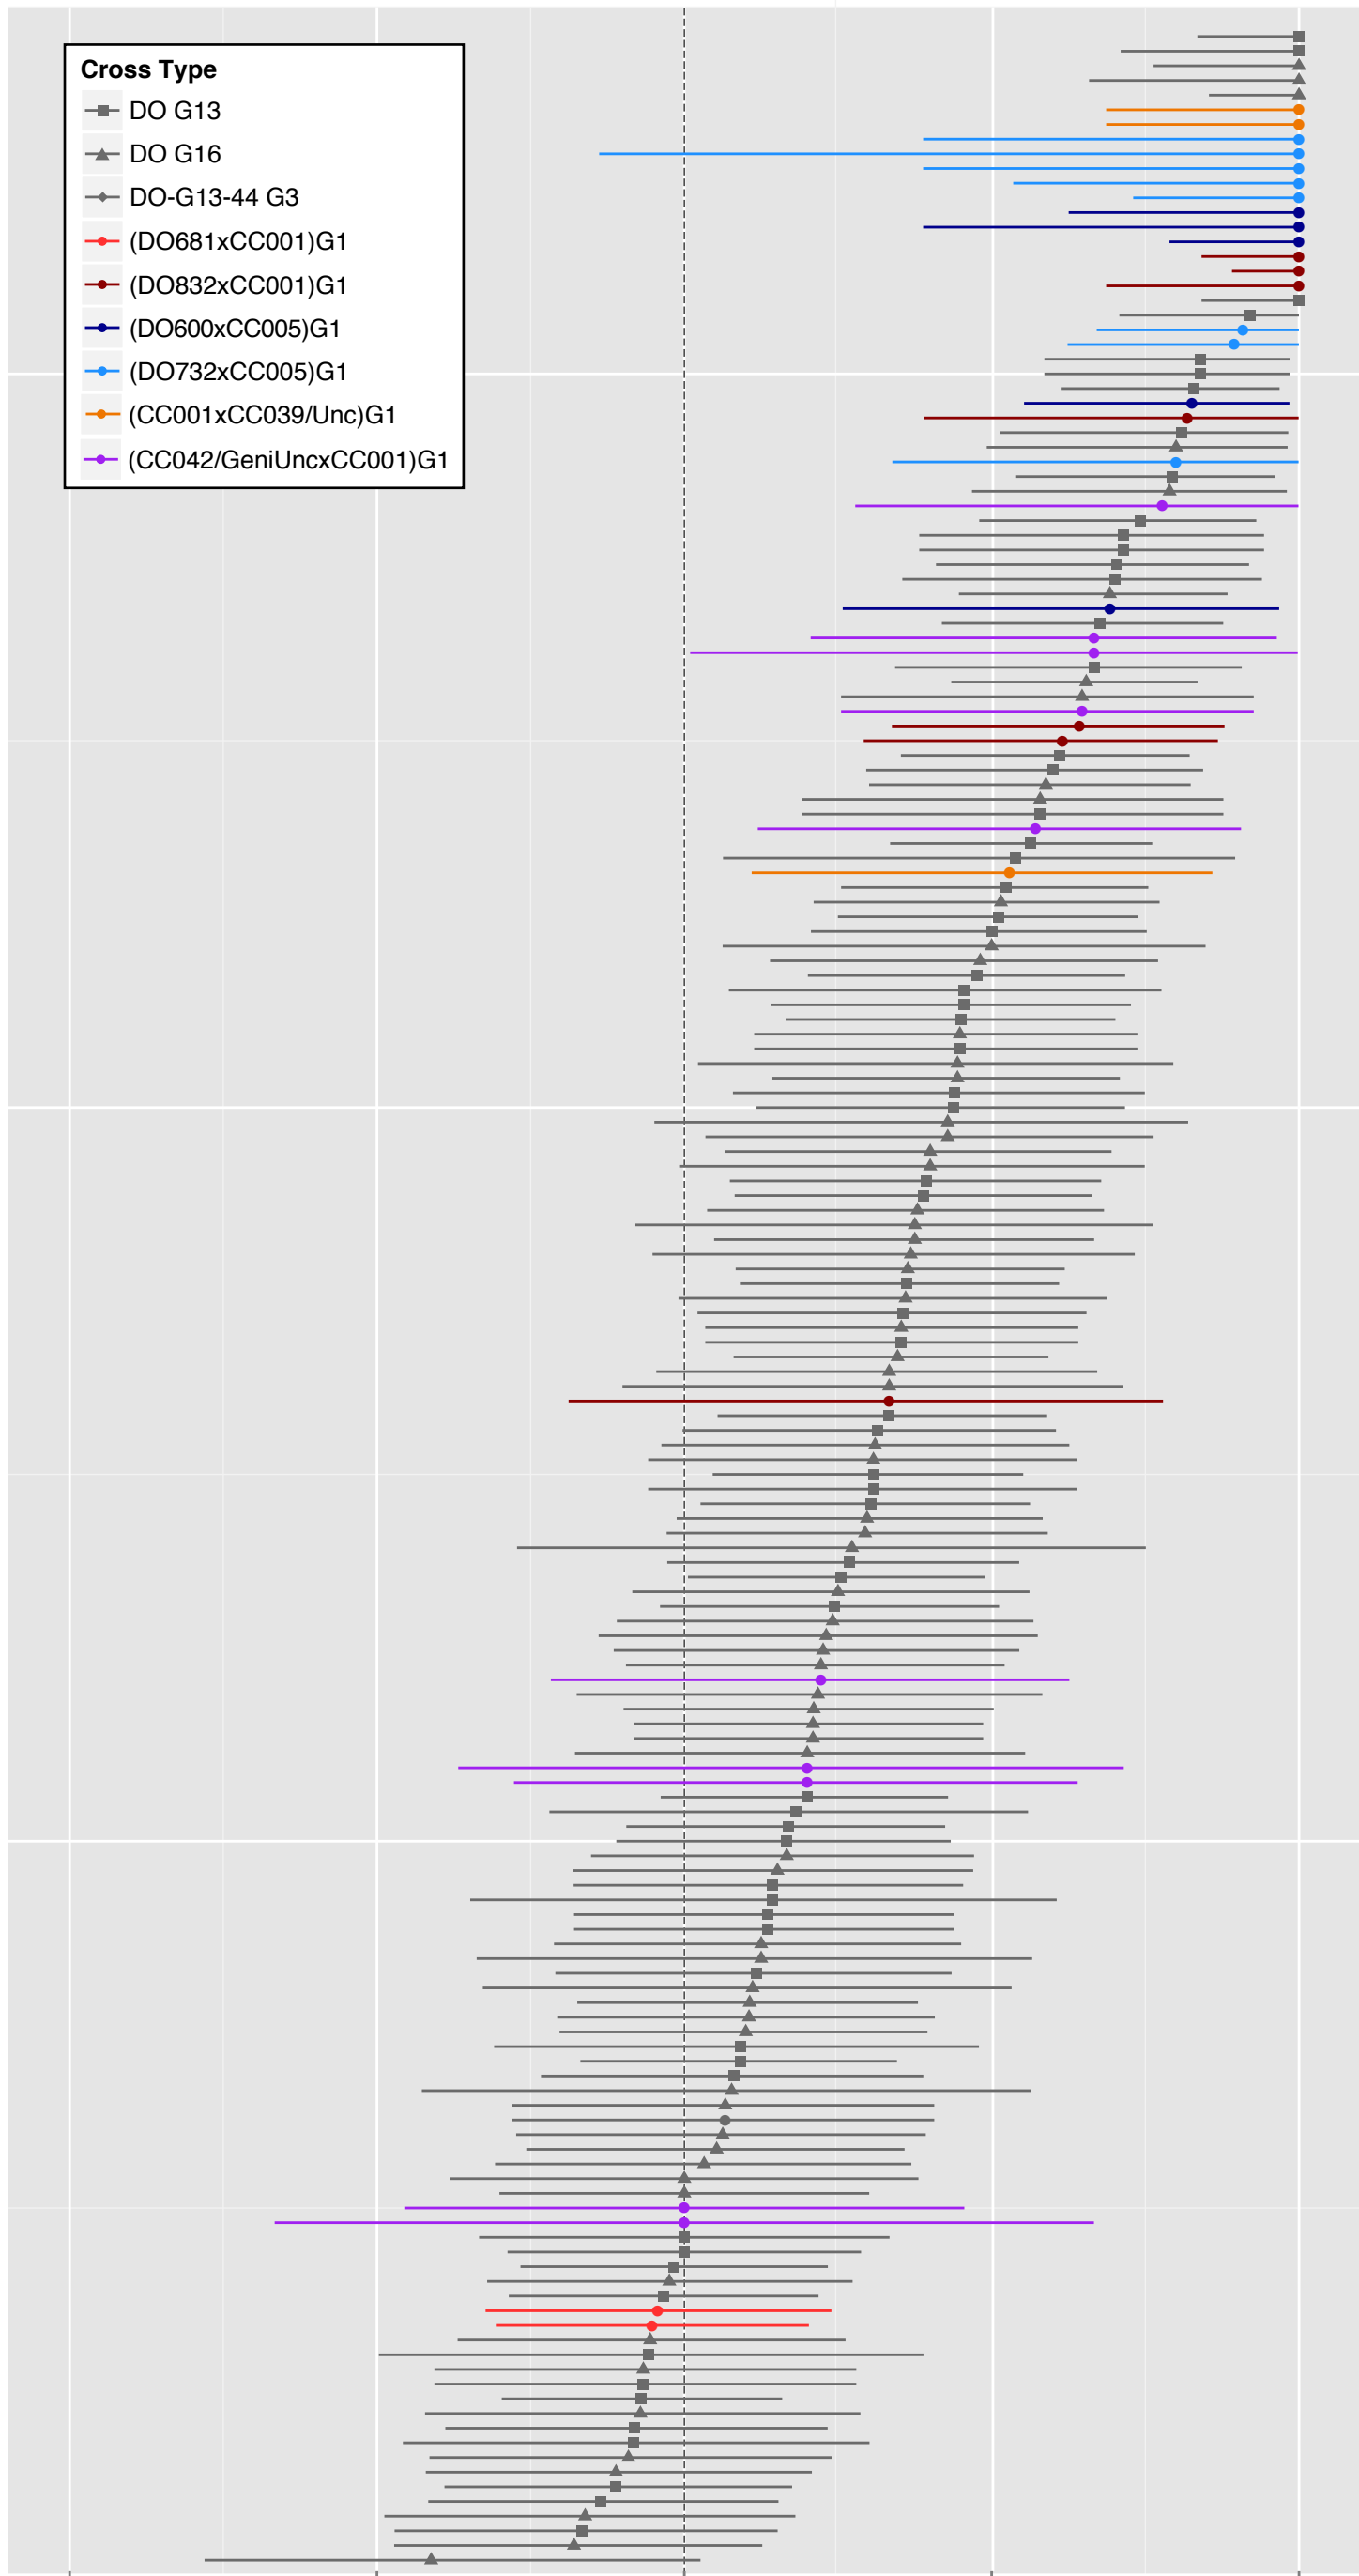

Supplement: Supplementary file [file 1]
